# Supplementary material for: One-pot pyrolytic synthesis of C–N-codoped mesoporous anatase TiO2and its highly efficient photo-degradation properties
Source: Royal Society of Chemistry journal article supplement (doi:10.1039/c2nj40901a), 2012-11-12
Supplement: c2nj40901a.pdf [file c2nj40901a.pdf]

## Supporting Information

# One-pot Pyrolytic Synthesis of C-N-codoped Mesoporous Anatase TiO<sub>2</sub> with Enhanced Photo-degradation Properties

Liang Li<sup>a,\*</sup>, Jingjing Shi<sup>a</sup>, Gengnan Li<sup>a</sup>, Yinyin Yuan<sup>a</sup>, Yongsheng Li<sup>a</sup>, Wenru Zhao<sup>a</sup> and Jianlin Shi<sup>a,b,\*</sup>

<sup>a</sup> Key Laboratory for Ultrafine Materials of Ministry of Education, School of Materials Science and Engineering, East China University of Science and Technology, Shanghai 200237, China ;

<sup>b</sup> State Key Laboratory of High Performance Ceramic and Superfine Microstructure, Shanghai Institute of Ceramics, Chinese Academy of Sciences, Shanghai 200050, China;

Tel: +86-21-64250740; Fax: +86-21-64250740; E-mail: liliang@ecust.edu.cn; jlshi@sum.shcnc.ac.cn.

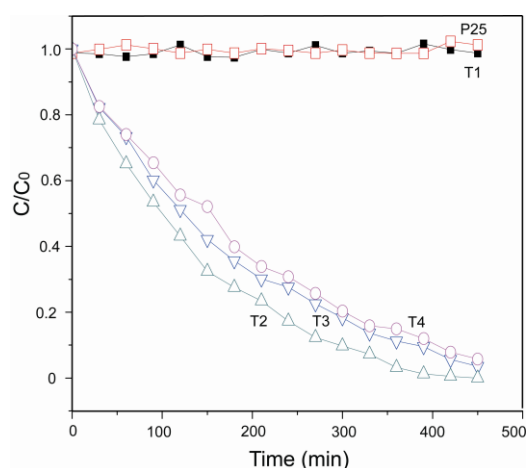

Fig. 1 Photocatalytic degradation of benzoic acid under visible light irradiation.

A 300 W Xe arc lamp was used as the visible light source and the visible wavelength was controlled through a 420 nm cutoff filter ( $\lambda \geq 420$  nm). In a typical process, 30 mg of the mesoporous structured titania material was dispersed into 100 ml benzoic acid aqueous solution (15 mg/L) with stirring in the dark for 30 min to achieve adsorption equilibrium prior to light irradiation. During the irradiation, 2 mL of the mixture was taken at a given time interval and centrifuged for 5 min to remove the photocatalyst powders and the absorbance spectrum was monitored using a UV-vis spectrophotometer.

Table 1 Pore structure parameters of calcined materials

| Sample | $S_{\text{BET}}$ (m <sup>2</sup> /g) | $V_{\text{BJH}}$ (cm <sup>3</sup> /g) | Pore diameter D (nm) |
|--------|--------------------------------------|---------------------------------------|----------------------|
| T1     | 129                                  | 0.17                                  | 4.1                  |
| T2     | 107                                  | 0.4                                   | 3.5                  |
| T3     | 64                                   | 0.18                                  | 8.4                  |
| T4     | 52                                   | 0.14                                  | 7.7                  |
